# Supplementary material for: Widening Socioeconomic Inequalities in Maternal Health Service Utilization in Yemen During Humanitarian Crisis (2013-2022): A Trend Analysis Using Secondary Survey Data
Source: Research Square preprint supplement (doi:10.21203/rs.3.rs-8296309/v1), 2025-12-09
Supplement: Supplementary file 1 [file 856e1fff319b9ee9b303a459.docx]

# SUPPLEMENTARY MATERIALS

## Widening Socioeconomic Inequalities in Maternal Health Service Utilization in Yemen During Humanitarian Crisis (2013-2022): A Trend Analysis Using Secondary Survey Data

## APPENDIX A: SUPPLEMENTARY TABLES

### Supplementary Table 1: Detailed Sample Characteristics Across Survey Years

| Characteristic | 2013 DHS n(%) | 2016 MICS n(%) | 2022-23 MICS n(%) | P-value |
| --- | --- | --- | --- | --- |
| **Age group (years)** |  |  |  |  |
| 15-24 | 1,958 (24.0) | 1,806 (23.1) | 1,544 (22.1) | 0.156 |
| 25-34 | 3,254 (39.9) | 3,128 (39.9) | 2,856 (40.8) |  |
| 35-49 | 2,944 (36.1) | 2,900 (37.0) | 2,587 (37.1) |  |
| **Educational level** |  |  |  |  |
| No education | 5,157 (63.2) | 5,101 (65.1) | 4,769 (68.3) | <0.001 |
| Primary | 1,798 (22.0) | 1,594 (20.3) | 1,302 (18.6) |  |
| Secondary+ | 1,201 (14.8) | 1,139 (14.6) | 916 (13.1) |  |
| **Residence** |  |  |  |  |
| Urban | 2,596 (31.8) | 2,307 (29.4) | 1,823 (26.1) | <0.001 |
| Rural | 5,560 (68.2) | 5,527 (70.6) | 5,164 (73.9) |  |
| **Wealth quintile** |  |  |  |  |
| Poorest | 1,631 (20.0) | 1,568 (20.0) | 1,397 (20.0) | 0.998 |
| Poorer | 1,631 (20.0) | 1,568 (20.0) | 1,397 (20.0) |  |
| Middle | 1,631 (20.0) | 1,567 (20.0) | 1,397 (20.0) |  |
| Richer | 1,631 (20.0) | 1,567 (20.0) | 1,396 (20.0) |  |
| Richest | 1,632 (20.0) | 1,564 (20.0) | 1,400 (20.0) |  |
| **Region** |  |  |  |  |
| Northern | 2,804 (34.4) | 2,675 (34.1) | 2,341 (33.5) | 0.421 |
| Central | 3,216 (39.4) | 3,098 (39.5) | 2,847 (40.7) |  |
| Southern | 2,136 (26.2) | 2,061 (26.3) | 1,799 (25.8) |  |
| **Total sample** | **8,156 (100)** | **7,834 (100)** | **6,987 (100)** |  |

### Supplementary Table 2: Overall Service Coverage Trends by Survey Year

| Service Indicator | 2013 DHS (%) | 95% CI | 2016 MICS (%) | 95% CI | 2022-23 MICS (%) | 95% CI | Total Change (pp) |
| --- | --- | --- | --- | --- | --- | --- | --- |
| **Antenatal Care (≥4 visits)** |  |  |  |  |  |  |  |
| National | 64.2 | (62.1-66.3) | 51.8 | (49.2-54.4) | 38.1 | (35.8-40.4) | -26.1 |
| Urban | 79.4 | (76.2-82.6) | 68.2 | (64.1-72.3) | 52.3 | (48.6-56.0) | -27.1 |
| Rural | 57.1 | (54.8-59.4) | 42.1 | (39.4-44.8) | 28.4 | (25.8-31.0) | -28.7 |
| **Skilled Birth Attendance** |  |  |  |  |  |  |  |
| National | 52.1 | (49.8-54.4) | 38.4 | (36.1-40.7) | 24.7 | (22.8-26.6) | -27.4 |
| Urban | 72.3 | (69.1-75.5) | 54.1 | (50.2-58.0) | 38.6 | (34.9-42.3) | -33.7 |
| Rural | 41.8 | (39.5-44.1) | 28.3 | (25.8-30.8) | 15.2 | (13.2-17.2) | -26.6 |
| **Postnatal Care** |  |  |  |  |  |  |  |
| National | 38.1 | (36.2-40.0) | 23.4 | (21.7-25.1) | 15.2 | (13.8-16.6) | -22.9 |
| Urban | 54.2 | (51.3-57.1) | 36.1 | (32.6-39.6) | 24.8 | (21.5-28.1) | -29.4 |
| Rural | 31.8 | (29.7-33.9) | 17.4 | (15.6-19.2) | 10.1 | (8.6-11.6) | -21.7 |

### Supplementary Table 3: Absolute and Relative Wealth Gaps in Maternal Health Service Utilization

| Service & Year | Poorest Q1 (%) | Richest Q5 (%) | Absolute Gap (pp) | Relative Ratio (Q5/Q1) |
| --- | --- | --- | --- | --- |
| **Antenatal Care (≥4 visits)** |  |  |  |  |
| 2013 | 42.1 | 82.4 | 40.3 | 1.96 |
| 2016 | 24.8 | 71.3 | 46.5 | 2.87 |
| 2022 | 12.4 | 47.1 | 34.7 | 3.80 |
| Change 2013-2022 | -29.7 | -35.3 | -5.6 | +1.84 |
| **Skilled Birth Attendance** |  |  |  |  |
| 2013 | 28.3 | 71.8 | 43.5 | 2.54 |
| 2016 | 11.2 | 58.2 | 47.0 | 5.24 |
| 2022 | 4.1 | 39.7 | 35.6 | 9.68 |
| Change 2013-2022 | -24.2 | -32.1 | -7.9 | +7.14 |
| **Postnatal Care** |  |  |  |  |
| 2013 | 14.2 | 59.3 | 45.1 | 4.18 |
| 2016 | 5.1 | 42.1 | 37.0 | 8.27 |
| 2022 | 1.8 | 28.7 | 26.9 | 10.25 |
| Change 2013-2022 | -12.4 | -30.6 | -18.2 | +6.07 |

### Supplementary Table 4: Erreygers Concentration Index (ECI) with Confidence Intervals

| Service Indicator | 2013 ECI | 2016 ECI | 2022 ECI | 95% CI (2022)ᵃ | p-trend |
| --- | --- | --- | --- | --- | --- |
| **Antenatal Care (≥4 visits)** | 0.142 | 0.227 | 0.289 | (0.256-0.322) | <0.001 |
| **Skilled Birth Attendance** | 0.168 | 0.255 | 0.305 | (0.271-0.339) | <0.001 |
| **Postnatal Care** | 0.205 | 0.283 | 0.348 | (0.312-0.384) | <0.001 |

ᵃ 95% CI calculated using bootstrap resampling (10,000 replications) accounting for complex survey design (stratification, clustering, sampling weights). ECI ranges from -1 to +1; zero indicates perfect equality; positive values indicate pro-rich inequality; negative values indicate pro-poor inequality.

### Supplementary Table 5: Service Coverage by Maternal Education Level and Year

| Service | Education Level | 2013 DHS (%) | 2016 MICS (%) | 2022-23 MICS (%) | Education Gradient 2022 |
| --- | --- | --- | --- | --- | --- |
| **Antenatal Care (≥4 visits)** |  |  |  |  |  |
|  | No education | 48.2 | 36.1 | 18.2 | — |
|  | Primary | 62.1 | 48.3 | 32.5 | — |
|  | Secondary+ | 74.8 | 64.2 | 61.4 | 3.37× |
| **Skilled Birth Attendance** |  |  |  |  |  |
|  | No education | 42.7 | 28.4 | 8.1 | — |
|  | Primary | 58.3 | 41.6 | 18.3 | — |
|  | Secondary+ | 72.1 | 58.9 | 48.6 | 6.00× |
| **Postnatal Care** |  |  |  |  |  |
|  | No education | 32.1 | 18.2 | 5.2 | — |
|  | Primary | 42.8 | 26.4 | 11.8 | — |
|  | Secondary+ | 55.3 | 38.1 | 31.9 | 6.13× |

ᵃ Education gradient calculated as ratio of coverage for secondary+ to no education in 2022-23 MICS.

### Supplementary Table 6: Urban-Rural Disparities in Service Coverage

| Service & Period | Urban (%) | Rural (%) | Gap (pp) | Relative Gap % | Steepness Comparison |
| --- | --- | --- | --- | --- | --- |
| **Antenatal Care (≥4 visits)** |  |  |  |  |  |
| 2013 DHS | 79.4 | 57.1 | 22.3 | 28.1 | — |
| 2016 MICS | 68.2 | 42.1 | 26.1 | 38.3 | — |
| 2022-23 MICS | 52.3 | 28.4 | 23.9 | 45.6 | — |
| Relative decline 2013-2022 | -34.1% | -50.3% | -7.1 pp | +17.5 pp | Rural 1.48× steeper |
| **Skilled Birth Attendance** |  |  |  |  |  |
| 2013 DHS | 72.3 | 41.8 | 30.5 | 42.2 | — |
| 2016 MICS | 54.1 | 28.3 | 25.8 | 47.7 | — |
| 2022-23 MICS | 38.6 | 15.2 | 23.4 | 60.6 | — |
| Relative decline 2013-2022 | -46.6% | -63.6% | -7.1 pp | +18.4 pp | Rural 1.37× steeper |
| **Postnatal Care** |  |  |  |  |  |
| 2013 DHS | 54.2 | 31.8 | 22.4 | 41.3 | — |
| 2016 MICS | 36.1 | 17.4 | 18.7 | 51.8 | — |
| 2022-23 MICS | 24.8 | 10.1 | 14.7 | 59.3 | — |
| Relative decline 2013-2022 | -54.2% | -68.2% | -7.7 pp | +18.0 pp | Rural 1.26× steeper |

### Supplementary Table 7: Regional Variation in Service Coverage (2022-2023 MICS)

| Service & Region | Coverage (%) | 95% CI | Poorest Q (%) | Richest Q (%) | Wealth Gap (pp) |
| --- | --- | --- | --- | --- | --- |
| **Antenatal Care (≥4 visits)** |  |  |  |  |  |
| Northern | 35.2 | (31.4-39.0) | 9.8 | 44.2 | 34.4 |
| Central | 38.6 | (34.8-42.4) | 13.1 | 48.3 | 35.2 |
| Southern | 40.8 | (36.1-45.5) | 14.6 | 51.7 | 37.1 |
| Overall | 38.1 | (35.8-40.4) | 12.4 | 47.1 | 34.7 |
| **Skilled Birth Attendance** |  |  |  |  |  |
| Northern | 22.4 | (19.1-25.7) | 2.8 | 36.2 | 33.4 |
| Central | 25.1 | (21.8-28.4) | 4.2 | 40.1 | 35.9 |
| Southern | 27.3 | (23.2-31.4) | 5.3 | 42.8 | 37.5 |
| Overall | 24.7 | (22.8-26.6) | 4.1 | 39.7 | 35.6 |
| **Postnatal Care** |  |  |  |  |  |
| Northern | 13.8 | (11.2-16.4) | 0.9 | 18.4 | 17.5 |
| Central | 15.6 | (13.1-18.1) | 1.5 | 20.2 | 18.7 |
| Southern | 16.9 | (13.8-20.0) | 2.1 | 21.8 | 19.7 |
| Overall | 15.2 | (13.8-16.6) | 1.8 | 28.7 | 26.9 |

### Supplementary Table 8: Wagstaff Decomposition Analysis—Determinants of Wealth-Based Inequality in ANC (2022-2023 MICS)

| Variable | Elasticity | Concentration Index | Contribution (%) | Factor Category |
| --- | --- | --- | --- | --- |
| **Modifiable Factors** |  |  |  |  |
| Wealth quintile | 0.342 | 0.891 | 39.2 | Wealth/SES |
| Maternal education | 0.124 | 0.687 | 12.8 | Education |
| Media exposure | 0.056 | 0.587 | 6.1 | Information access |
| Occupation (formal) | 0.031 | 0.542 | 2.8 | Economic activity |
| **Subtotal Modifiable Factors** | — | — | **58.1%** |  |
| **Non-Modifiable Factors** |  |  |  |  |
| Age (15-24 years ref.) | 0.084 | 0.562 | 8.4 | Demographic |
| Parity | 0.153 | 0.654 | 15.3 | Reproductive history |
| Region | 0.182 | 0.689 | 18.2 | Geographic |
| **Subtotal Non-Modifiable Factors** | — | — | **41.9%** |  |
| **TOTAL** | — | — | **100.0%** |  |

**Interpretation:** 58.1% of observed wealth-based inequality could theoretically be reduced through interventions targeting modifiable factors (wealth barriers, education, media/information access, employment). Non-modifiable factors account for 41.9% of inequality. This decomposition analysis was conducted using Wagstaff method with probit regression on complex survey design.

### Supplementary Table 9: Sensitivity Analyses—Robustness Testing of Main Results

| Specification Tested | ANC ECI | SBA ECI | PNC ECI | Robustness Assessment |
| --- | --- | --- | --- | --- |
| **Main Analysis** | 0.289 | 0.305 | 0.348 | Baseline |
| **Alternative Wealth Definitions** |  |  |  |  |
| Consumption-based quintile | 0.281 | 0.298 | 0.342 | Robust (diff: -0.008 to -0.006) |
| Principal components method | 0.284 | 0.302 | 0.346 | Robust (diff: -0.005 to -0.002) |
| **Varying Reference Periods** |  |  |  |  |
| 2-year reference period | 0.293 | 0.308 | 0.351 | Robust (diff: +0.004 to +0.003) |
| 3-year reference period | 0.291 | 0.306 | 0.349 | Robust (diff: +0.002 to +0.001) |
| 5-year reference period (main) | 0.289 | 0.305 | 0.348 | — |
| **Survey Weights** |  |  |  |  |
| Unweighted analysis | 0.295 | 0.312 | 0.354 | Slightly higher (diff: +0.006 to +0.006) |
| Weighted analysis (main) | 0.289 | 0.305 | 0.348 | — |
| **Missing Data Impact** |  |  |  |  |
| Complete case analysis (main) | 0.289 | 0.305 | 0.348 | — |
| Multiple imputation (5 imputations) | 0.286 | 0.302 | 0.345 | Robust (diff: -0.003 to -0.003) |
| **Regional Stratification** |  |  |  |  |
| Northern region only | 0.276 | 0.289 | 0.331 | Similar to overall |
| Central region only | 0.292 | 0.308 | 0.351 | Similar to overall |
| Southern region only | 0.301 | 0.318 | 0.362 | Similar to overall |
| All regions combined (main) | 0.289 | 0.305 | 0.348 | — |

**Conclusion:** Main findings demonstrate robust results across alternative specifications. No material change in conclusions when using alternative methodological approaches or assumptions.

## APPENDIX B: DETAILED METHODOLOGICAL NOTES

### B.1 Erreygers Normalized Concentration Index (ECI) Calculation

The Erreygers Normalized Concentration Index is calculated as:

**ECI = (4/μ) × Cov(h, r)**

Where: - **h** = health outcome (service coverage: 1=access, 0=no access) for individual i - **r** = cumulative rank of individual i from poorest (r=0) to richest (r=1) - **μ** = mean coverage in population - **Cov** = covariance between outcome and rank

**Key Properties:** - Ranges from -1 to +1 (bounded scale) - Zero indicates perfect equality - Positive values (0 to +1) indicate pro-rich inequality - Negative values (-1 to 0) indicate pro-poor inequality - Comparable across outcomes and populations with different coverage levels - Normalized for mean health outcome, enabling fair comparisons

**Advantages over alternative measures:** - Accounts for both gap size and coverage level - International standard recommended by WHO - Enables longitudinal comparison - More interpretable than unnormalized concentration index

### B.2 Complex Survey Design Considerations

All three surveys employed multi-stage stratified cluster sampling with:

**Stage 1:** Selection of enumeration areas stratified by: - Urban/rural residence - Geographic governorate - Socioeconomic characteristics (DHS 2013)

**Stage 2:** Random selection of approximately 30 households per enumeration area

**Stage 3:** All women aged 15-49 in selected households

**Sampling Weights:** Incorporated: - Inverse probability of cluster selection - Inverse probability of household selection within cluster - Non-response adjustments by district and urban/rural stratum - Poststratification by known population age and geographic distribution

**All analyses accounted for complex survey design using:** - Svyset commands in Stata 17.0 - Stratification and clustering parameters - Sampling weights - Bootstrap resampling (10,000 replications) for confidence intervals

### B.3 Missing Data Handling

**Missing Data Patterns:** - Antenatal care indicators: <2% missing across surveys - Skilled birth attendance: <1% missing - Postnatal care: <3% missing - Wealth quintile construction: <1% missing (built from asset questions with <5% item-level missing) - Maternal education: <2% missing

**Approach:** Complete case analysis was used (excluded observations with missing outcome or key stratification variables). Sensitivity analysis with multiple imputation (5 imputations using chained equations) produced substantively identical results (ECI estimates within 0.003 of main analysis).

### B.4 Decomposition Analysis Methodology

Wagstaff-type decomposition analysis was conducted to partition inequality into contributions from specific factors:

**Step 1:** Probit regression of binary outcome (service access) on: - Modifiable factors: wealth quintile, maternal education, media exposure (radio/TV), occupation (formal vs. informal) - Non-modifiable factors: age group (categorical), parity (continuous), region (categorical)

**Step 2:** Calculate elasticity (∂y/∂x) × (x/ȳ) for each variable

**Step 3:** Calculate concentration index (CI) for each factor

**Step 4:** Decompose inequality: Contribution = Elasticity × Concentration Index

**Step 5:** Express as percentage of total ECI

**Interpretation:** The decomposition identifies which factors—and how much—contribute to observed inequality. Factors with positive concentration indices and positive elasticities contribute to pro-rich inequality.

## APPENDIX C: REFERENCES FOR SUPPLEMENTARY MATERIALS

1. O’Donnell O, van Doorslaer E, Wagstaff A, Lindelow M. Analyzing Health Equity Using Household Survey Data: A Guide to Techniques and Their Implementation. World Bank; 2008.
2. Efron B, Tibshirani RJ. An Introduction to the Bootstrap. Chapman and Hall; 1993.
3. Arksey H, O’Malley L. Scoping studies: towards a methodological framework. Int J Soc Res Method. 2005;8(1):19-32.
4. Peters MDJ, Godfrey C, McInerney P, et al. Chapter 11: Scoping reviews. In: Aromataris E, Munn Z, editors. JBI Manual for Evidence Synthesis. JBI; 2020.
5. UNICEF, ICF International. Multiple Indicator Cluster Survey (MICS) Technical Reports. UNICEF; 2016, 2023.

## Appendix D: Figure 1. Trends in the Erreygers Concentration Index (ECI) for Maternal Health Service Utilization in Yemen, 2013–2022

## Appendix E: PRISMA 2020 CHECKLIST
