# Supplementary material for: Widening Socioeconomic Inequalities in Maternal Health Service Utilization in Yemen During Humanitarian Crisis (2013-2022): A Trend Analysis Using Secondary Survey Data
Source: Research Square preprint supplement (doi:10.21203/rs.3.rs-8296309/v1), 2025-12-09
Supplement: Supplementary file 1 [file dcec63ba6c1b968db3986df8.pdf]

# PRISMA 2020 CHECKLIST – Supplementary File

| Section & Topic             | Item | Checklist Description                                                   | Reported in Manuscript           |
|-----------------------------|------|-------------------------------------------------------------------------|----------------------------------|
| Title                       | 1    | Identify report as a trend analysis using secondary datasets.           | Title Page                       |
| Abstract                    | 2    | Provide structured summary (Background, Methods, Results, Conclusions). | Abstract                         |
| Introduction                | 3    | Describe rationale for assessing inequality trends.                     | Background                       |
| Introduction                | 4    | Provide clear study objectives.                                         | Background (final paragraph)     |
| Methods – Eligibility       | 5    | State dataset inclusion criteria.                                       | Methods – Data Sources           |
| Methods – Info Sources      | 6    | Identify data repositories (DHS, MICS).                                 | Methods – Data Sources           |
| Methods – Search            | 7    | Describe dataset identification process.                                | Methods – Dataset Selection      |
| Methods – Selection         | 8    | Explain how datasets were screened for relevance/completeness.          | Methods – Dataset Selection      |
| Methods – Data Items        | 9    | Describe procedures for data extraction.                                | Methods – Measures               |
| Methods – Variables         | 10   | List extracted variables.                                               | Methods + Supplementary Tables   |
| Methods – Bias              | 11   | Address potential data-level biases.                                    | Methods – Bias Considerations    |
| Methods – Analysis          | 12   | Specify effect measures (ECI).                                          | Methods – Inequality Measurement |
| Methods – Synthesis         | 13   | Describe harmonization and trend analysis steps.                        | Methods – Statistical Analysis   |
| Methods – Reporting Bias    | 14   | State no selective reporting occurred.                                  | Methods – Limitations            |
| Results – Selection         | 15   | Provide dataset flow and reasons for inclusion.                         | Results – Dataset Overview       |
| Results – Characteristics   | 16   | Describe dataset attributes.                                            | Results + Supplementary Tables   |
| Results – Synthesis         | 17   | Present results for each dataset year.                                  | Results – Table + Figure 1       |
| Results – Interpretation    | 18   | Describe inequality trends.                                             | Results – Narrative              |
| Discussion – Summary        | 19   | Discuss main findings.                                                  | Discussion                       |
| Discussion – Limitations    | 20   | Discuss study limitations.                                              | Discussion – Limitations         |
| Discussion – Implications   | 21   | Discuss policy & research implications.                                 | Discussion – Implications        |
| Other – Registration        | 22   | State registration not applicable.                                      | Declarations                     |
| Other – Funding             | 23   | Describe funding sources.                                               | Funding Statement                |
| Other – Competing Interests | 24   | Declare conflicts of interest.                                          | Competing Interests              |
| Other – Data Availability   | 25   | Provide data and code availability.                                     | Data Availability Statement      |
| Other – Ethics              | 26   | Provide ethics approval details.                                        | Ethics Statement                 |
